# Supplementary material for: What are the roles of N3 and N5 rings in designing polynitrogen molecules?
Source: Royal Society of Chemistry journal article supplement (doi:10.1039/c2dt31016c), 2012-01-01
Supplement: c2dt31016c.pdf [file c2dt31016c.pdf]

## Supporting information for What are the roles of N<sub>3</sub> and N<sub>5</sub> rings in designing polynitrogen molecules?

Yan Hong Liang,<sup>§</sup> Min Guo,<sup>§</sup> Qiong Luo\*,<sup>†</sup> Qian Shu Li<sup>§,†</sup>

<sup>§</sup>*State Key Laboratory of Explosion Science and Technology, Beijing Institute of Technology, Beijing 100081, P. R. China*

<sup>†</sup>*School of Chemistry and Environment, South China Normal University; Key Laboratory of Theoretical Chemistry of Environment, Ministry of Education, Guangzhou, China, 510006*

### Contents:

**Fig. S-1** Contour plot showing the potential energy for N<sub>5</sub>(N<sub>3</sub>)<sub>3</sub> as a function of the two dihedral angles,  $\chi_1$  (N4-N2-N3-N1) and  $\chi_2$  (N10-N3-N1-N2). DFT calculations at the B3LYP/cc-pVDZ level of theory were used to generate the energies for the plot for 30° increments of each dihedral angle.

**Table S-1** Relative energy values of various points on potential energy surface with respect to the first point ( $\chi_1=0^\circ$ ,  $\chi_2=0^\circ$ ). These values are obtained by the relaxed potential energy (PER) scan along the two dihedral angles around N4-N2-N3-N1 ( $\chi_1$ ) and N10-N3-N1-N2 ( $\chi_2$ ) (kcal/mol) with 30° increment in a range from 0° to 360°.

**Table S-2** Relative energies (kcal/mol) for N<sub>6</sub>, N<sub>10</sub> and N<sub>8</sub> isomers at different level of theory.

**Table S-3** Coordinates of all systems studied at B3LYP/cc-pVDZ, B3PW91/cc-pVDZ, MP2/cc-pVDZ and B3LYP/cc-pVTZ level of theory.

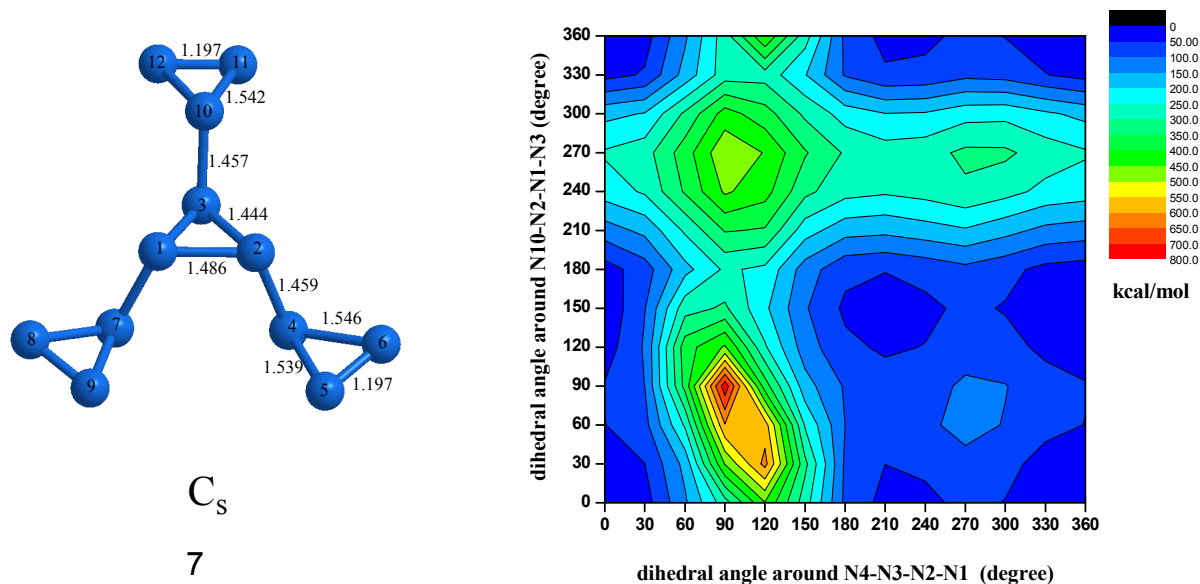

**Fig. S-1** (a) Structure and bond lengths of N3(N3)3 (b) Contour plot showing the potential energy for N3(N3)3 as a function of the two dihedral angles,  $\chi_1$  (N4-N2-N3-N1) and  $\chi_2$  (N10-N3-N1-N2). DFT calculations at the B3LYP/cc-pVDZ level of theory were used to generate the energies for the plot for 30° increments of each dihedral angle.

**Table S-1** Relative energy values of various points on potential energy surface with respect to the first point ( $\chi_1=0^\circ$ ,  $\chi_2=0^\circ$ ). These values are obtained by the relaxed potential energy (PER) scan along the two dihedral angles around N4-N2-N3-N1 ( $\chi_1$ ) and N10-N3-N1-N2 ( $\chi_2$ ) (kcal/mol) with 30° increment in a range from 0° to 360°.

|      | 0°    | 30°   | 60°   | 90°   | 120°  | 150°  | 180°  | 210°  | 240°  | 270°  | 300°  | 330°  | 360°  |
|------|-------|-------|-------|-------|-------|-------|-------|-------|-------|-------|-------|-------|-------|
| 0°   | 0.0   | 15.5  | 54.0  | 70.2  | 34.6  | 4.7   | 5.6   | 49.6  | 128.8 | 190.6 | 103.4 | 23.7  | 0.0   |
| 30°  | 17.2  | 31.7  | 69.8  | 88.1  | 53.2  | 22.8  | 23.2  | 67.5  | 147.6 | 209.3 | 122.5 | 41.9  | 17.2  |
| 60°  | 49.1  | 62.5  | 98.9  | 118.3 | 85.6  | 55.6  | 57.5  | 104.6 | 180.8 | 241.2 | 153.9 | 73.8  | 49.1  |
| 90°  | 54.0  | 67.8  | 103.6 | 120.2 | 89.0  | 61.8  | 72.9  | 117.7 | 182.0 | 243.3 | 154.7 | 77.1  | 54.0  |
| 120° | 24.9  | 40.0  | 77.4  | 92.6  | 59.3  | 34.8  | 45.9  | 80.0  | 151.1 | 214.3 | 124.8 | 47.6  | 24.9  |
| 150° | 8.0   | 24.0  | 61.7  | 75.4  | 41.4  | 14.3  | 16.1  | 56.9  | 137.1 | 199.5 | 107.2 | 30.3  | 8.0   |
| 180° | 26.65 | 41.0  | 77.8  | 94.5  | 61.3  | 31.5  | 31.8  | 75.3  | 156.8 | 216.9 | 128.0 | 50.7  | 26.7  |
| 210° | 125.8 | 139.0 | 175.3 | 195.5 | 162.8 | 131.9 | 131.4 | 172.3 | 255.5 | 311.9 | 229.1 | 151.9 | 125.8 |
| 240° | 223.7 | 237.6 | 273.8 | 294.2 | 260.7 | 230.2 | 229.8 | 268.4 | 354.3 | 402.7 | 324.7 | 248.9 | 223.7 |
| 270° | 255.9 | 271.5 | 308.7 | 324.0 | 289.6 | 260.7 | 262.0 | 302.6 | 381.1 | 439.1 | 351.5 | 277.5 | 255.9 |
| 300° | 185.0 | 202.1 | 240.4 | 251.4 | 216.2 | 188.2 | 190.5 | 234.5 | 309.2 | 371.7 | 281.9 | 205.6 | 185.0 |
| 330° | 32.5  | 48.9  | 87.6  | 101.2 | 65.5  | 36.4  | 38.0  | 82.1  | 159.8 | 220.8 | 133.2 | 54.9  | 32.5  |
| 360° | 0.0   | 15.5  | 54.1  | 70.2  | 34.6  | 4.7   | 5.6   | 49.6  | 128.8 | 190.6 | 103.4 | 23.7  | 0.0   |

**Table S-2** Relative energies(kcal/mol) for N<sub>6</sub>, N<sub>10</sub> and N<sub>8</sub> isomers at different level of theory. The structure numbers listed here are corresponding to the structure numbers listed in the article.

| species and their relative energies at different level of theory |          |          |          |          |
|------------------------------------------------------------------|----------|----------|----------|----------|
|                                                                  | <b>1</b> | <b>2</b> |          |          |
| B3LYP/cc-pVDZ                                                    | 0.0      | 81.6     |          |          |
| B3LYP/cc-pVTZ                                                    | 0.0      | 83.9     |          |          |
| B3PW91/cc-pVDZ                                                   | 0.0      | 76.2     |          |          |
| MP2/cc-pVDZ                                                      | 0.0      | 88.5     |          |          |
| CCSD(T)/cc-pVDZ//MP2/cc-pVDZ                                     | 0.0      | 82.1     |          |          |
|                                                                  | <b>3</b> | <b>4</b> | <b>5</b> | <b>6</b> |
| B3LYP/cc-pVDZ                                                    | 0.0      | 4.4      | 249.2    | 64.2     |
| B3LYP/cc-pVTZ                                                    | 0.0      | 4.8      | 254.6    | 66.9     |
| B3PW91/cc-pVDZ                                                   | 0.0      | 4.2      | 246.6    | 66.0     |
| MP2/cc-pVDZ                                                      | 0.0      | 3.1      | 264.5    | 73.7     |
| CCSD(T)/cc-pVDZ//MP2/cc-pVDZ                                     | 0.0      | 4.9      | 242.3    | 61.5     |
|                                                                  | <b>7</b> | <b>8</b> |          |          |
| B3LYP/cc-pVDZ                                                    | 0.0      | 18.0     |          |          |
| B3LYP/cc-pVTZ                                                    | -        | -        |          |          |
| B3PW91/cc-pVDZ                                                   | 0.0      | 21.5     |          |          |
| MP2/cc-pVDZ                                                      | 0.0      | 16.1     |          |          |
| CCSD(T)/cc-pVDZ//MP2/cc-pVDZ                                     | 0.0      | 54.4     |          |          |

**Table S-3** Coordinates of all systems studied

Below are the xyz coordinates in Å of all systems studied. They are calculated at B3LYP/cc-pVDZ, B3PW91/cc-pVDZ, MP2/cc-pVDZ and B3LYP/cc-pVTZ level of theory, respectively.

|                                    |          |              |           |                                    |          |              |           |
|------------------------------------|----------|--------------|-----------|------------------------------------|----------|--------------|-----------|
| B3LYP                              |          |              |           | B3PW91                             |          |              |           |
| cyclic-N <sub>3</sub>              |          | -164.0947041 | Hartrees  | cyclic-N <sub>3</sub>              |          | -164.0315709 | Hartrees  |
| Atom                               | x        | y            | z         | Atom                               | x        | y            | z         |
| N                                  | 0.000000 | 0.613419     | -0.440604 | N                                  | 0.000000 | 0.613123     | -0.435900 |
| N                                  | 0.000000 | -0.613419    | -0.440604 | N                                  | 0.000000 | -0.613123    | -0.435900 |
| N                                  | 0.000000 | 0.000000     | 0.881209  | N                                  | 0.000000 | 0.000000     | 0.871800  |
| B3LYP                              |          |              |           | B3PW91                             |          |              |           |
| cyclic-N <sub>5</sub>              |          | -273.6326579 | Hartrees  | cyclic-N <sub>5</sub>              |          | -273.483768  | Hartrees  |
| Atom                               | x        | y            | z         | Atom                               | x        | y            | z         |
| N                                  | 0.000000 | 0.758340     | -0.878480 | N                                  | 0.000000 | 0.731192     | -0.865911 |
| N                                  | 0.000000 | 1.132719     | 0.319729  | N                                  | 0.000000 | 1.121008     | 0.320426  |
| N                                  | 0.000000 | -0.758340    | -0.878480 | N                                  | 0.000000 | -0.731192    | -0.865911 |
| N                                  | 0.000000 | 0.000000     | 1.117502  | N                                  | 0.000000 | 0.000000     | 1.090969  |
| N                                  | 0.000000 | -1.132719    | 0.319729  | N                                  | 0.000000 | -1.121008    | 0.320426  |
| B3LYP                              |          |              |           | B3PW91                             |          |              |           |
| N <sub>3</sub> -N <sub>3</sub> (1) |          | -328.2465755 | Hartrees  | N <sub>3</sub> -N <sub>3</sub> (1) |          | -328.1214243 | Hartrees  |
| Atom                               | x        | y            | z         | Atom                               | x        | y            | z         |

|   |           |           |           |
|---|-----------|-----------|-----------|
| N | 0.000000  | 1.735480  | 0.602430  |
| N | 0.000000  | 1.735480  | -0.602430 |
| N | -0.572491 | 0.463485  | 0.000000  |
| N | 0.572491  | -0.463485 | 0.000000  |
| N | 0.000000  | -1.735480 | 0.602430  |
| N | 0.000000  | -1.735480 | -0.602430 |

---

B3LYP

|                                    |           |              |           |
|------------------------------------|-----------|--------------|-----------|
| N <sub>3</sub> -N <sub>3</sub> (2) |           | -328.1191267 | Hartrees  |
| Atom                               | x         | y            | z         |
| N                                  | 0.000000  | 0.855292     | 0.761832  |
| N                                  | 0.740705  | -0.427646    | -0.761832 |
| N                                  | -0.740705 | -0.427646    | 0.761832  |
| N                                  | -0.740705 | -0.427646    | -0.761832 |
| N                                  | 0.740705  | -0.427646    | 0.761832  |
| N                                  | 0.000000  | 0.855292     | -0.761832 |

---

B3LYP

|                                    |           |              |           |
|------------------------------------|-----------|--------------|-----------|
| N <sub>5</sub> -N <sub>5</sub> (3) |           | -547.3096703 | Hartrees  |
| Atom                               | x         | y            | z         |
| N                                  | 0.000000  | 0.689071     | 2.630362  |
| N                                  | 0.000000  | 1.118743     | 1.423621  |
| N                                  | 0.000000  | 0.000000     | 0.676304  |
| N                                  | 0.000000  | -1.118743    | 1.423621  |
| N                                  | 0.000000  | -0.689071    | 2.630362  |
| N                                  | 0.000000  | 0.000000     | -0.676304 |
| N                                  | -1.118743 | 0.000000     | -1.423621 |
| N                                  | -0.689071 | 0.000000     | -2.630362 |
| N                                  | 0.689071  | 0.000000     | -2.630362 |
| N                                  | 1.118743  | 0.000000     | -1.423621 |

---

B3LYP

|                                    |          |              |           |
|------------------------------------|----------|--------------|-----------|
| N <sub>5</sub> -N <sub>5</sub> (4) |          | -547.3025581 | Hartrees  |
| Atom                               | x        | y            | z         |
| N                                  | 0.000000 | 0.679503     | 2.634659  |
| N                                  | 0.000000 | 1.116699     | 1.417245  |
| N                                  | 0.000000 | 0.000000     | 0.685435  |
| N                                  | 0.000000 | -1.116699    | 1.417245  |
| N                                  | 0.000000 | -0.679503    | 2.634659  |
| N                                  | 0.000000 | 0.000000     | -0.685435 |
| N                                  | 0.000000 | -1.116699    | -1.417245 |
| N                                  | 0.000000 | -0.679503    | -2.634659 |
| N                                  | 0.000000 | 0.679503     | -2.634659 |
| N                                  | 0.000000 | 1.116699     | -1.417245 |

---

B3LYP

|                                    |   |              |          |
|------------------------------------|---|--------------|----------|
| N <sub>5</sub> -N <sub>5</sub> (5) |   | -546.9088055 | Hartrees |
| Atom                               | x | y            | z        |

|   |           |           |           |
|---|-----------|-----------|-----------|
| N | 0.000000  | 1.718562  | 0.602691  |
| N | 0.000000  | 1.718562  | -0.602691 |
| N | -0.565347 | 0.464726  | 0.000000  |
| N | 0.565347  | -0.464726 | 0.000000  |
| N | 0.000000  | -1.718562 | 0.602691  |
| N | 0.000000  | -1.718562 | -0.602691 |

---

B3PW91

|                                    |           |              |           |
|------------------------------------|-----------|--------------|-----------|
| N <sub>3</sub> -N <sub>3</sub> (2) |           | -328.0026252 | Hartrees  |
| Atom                               | x         | y            | z         |
| N                                  | 0.000000  | 0.848951     | 0.756073  |
| N                                  | 0.735213  | -0.424476    | -0.756073 |
| N                                  | -0.735213 | -0.424476    | 0.756073  |
| N                                  | -0.735213 | -0.424476    | -0.756073 |
| N                                  | 0.735213  | -0.424476    | 0.756073  |
| N                                  | 0.000000  | 0.848951     | -0.756073 |

---

B3PW91

|                                    |           |              |           |
|------------------------------------|-----------|--------------|-----------|
| N <sub>5</sub> -N <sub>5</sub> (3) |           | -547.1079283 | Hartrees  |
| Atom                               | x         | y            | z         |
| N                                  | 0.000000  | 0.683088     | 2.618592  |
| N                                  | 0.000000  | 1.113167     | 1.413439  |
| N                                  | 0.000000  | 0.000000     | 0.673971  |
| N                                  | 0.000000  | -1.113167    | 1.413439  |
| N                                  | 0.000000  | -0.683088    | 2.618592  |
| N                                  | 0.000000  | 0.000000     | -0.673971 |
| N                                  | -1.113167 | 0.000000     | -1.413439 |
| N                                  | -0.683088 | 0.000000     | -2.618592 |
| N                                  | 0.683088  | 0.000000     | -2.618592 |
| N                                  | 1.113167  | 0.000000     | -1.413439 |

---

B3PW91

|                                    |          |              |           |
|------------------------------------|----------|--------------|-----------|
| N <sub>5</sub> -N <sub>5</sub> (4) |          | -547.1010323 | Hartrees  |
| Atom                               | x        | y            | z         |
| N                                  | 0.000000 | 0.675021     | 2.622698  |
| N                                  | 0.000000 | 1.111562     | 1.408086  |
| N                                  | 0.000000 | 0.000000     | 0.682345  |
| N                                  | 0.000000 | -1.111562    | 1.408086  |
| N                                  | 0.000000 | -0.675021    | 2.622698  |
| N                                  | 0.000000 | 0.000000     | -0.682345 |
| N                                  | 0.000000 | -1.111562    | -1.408086 |
| N                                  | 0.000000 | -0.675021    | -2.622698 |
| N                                  | 0.000000 | 0.675021     | -2.622698 |
| N                                  | 0.000000 | 1.111562     | -1.408086 |

---

B3PW91

|                                    |   |              |          |
|------------------------------------|---|--------------|----------|
| N <sub>5</sub> -N <sub>5</sub> (5) |   | -546.7113186 | Hartrees |
| Atom                               | x | y            | z        |

|   |           |           |           |
|---|-----------|-----------|-----------|
| N | 0.000000  | 1.275046  | 0.760134  |
| N | -1.212641 | 0.394011  | 0.760134  |
| N | 1.212641  | 0.394011  | 0.760134  |
| N | 0.749453  | -1.031534 | 0.760134  |
| N | -0.749453 | -1.031534 | 0.760134  |
| N | -0.749453 | -1.031534 | -0.760134 |
| N | 0.749453  | -1.031534 | -0.760134 |
| N | 1.212641  | 0.394011  | -0.760134 |
| N | 0.000000  | 1.275046  | -0.760134 |
| N | -1.212641 | 0.394011  | -0.760134 |

B3LYP

N<sub>5</sub>-N<sub>5</sub>(6) -547.160051 Hartrees

| Atom | x         | y         | z         |
|------|-----------|-----------|-----------|
| N    | 0.000000  | 0.000000  | 1.084453  |
| N    | 1.152671  | 0.665495  | 0.465222  |
| N    | -1.152671 | 0.665495  | 0.465222  |
| N    | 0.000000  | -1.330990 | 0.465222  |
| N    | 0.613973  | 1.703512  | -0.413353 |
| N    | 1.782271  | -0.320040 | -0.413353 |
| N    | -0.613973 | 1.703512  | -0.413353 |
| N    | -1.782271 | -0.320040 | -0.413353 |
| N    | -1.168299 | -1.383472 | -0.413353 |
| N    | 1.168299  | -1.383472 | -0.413353 |

B3LYP

N<sub>3</sub>-N<sub>5</sub>(7) -437.776935 Hartrees

| Atom | x        | y         | z         |
|------|----------|-----------|-----------|
| N    | 0.000000 | 1.110002  | 1.262685  |
| N    | 0.000000 | 0.669594  | 0.000000  |
| N    | 0.000000 | -1.110002 | 1.262685  |
| N    | 0.000000 | 0.000000  | 1.981628  |
| N    | 0.000000 | -0.669594 | 0.000000  |
| N    | 0.000000 | -1.110002 | -1.262685 |
| N    | 0.000000 | 0.000000  | -1.981628 |
| N    | 0.000000 | 1.110002  | -1.262685 |

B3LYP

N<sub>3</sub>-N<sub>5</sub>(8) -437.7815432 Hartrees

| Atom | x         | y         | z         |
|------|-----------|-----------|-----------|
| N    | 0.518458  | 1.909316  | 0.685551  |
| N    | 0.518458  | 1.909316  | -0.685551 |
| N    | 0.041159  | 0.793112  | -1.112574 |
| N    | -0.247830 | 0.101922  | 0.000000  |
| N    | 0.041159  | 0.793112  | 1.112574  |
| N    | -0.953720 | -1.096252 | 0.000000  |
| N    | 0.041159  | -2.205263 | -0.591452 |

|   |           |           |           |
|---|-----------|-----------|-----------|
| N | 0.000000  | 1.265570  | 0.754491  |
| N | -1.203629 | 0.391083  | 0.754491  |
| N | 1.203629  | 0.391083  | 0.754491  |
| N | 0.743884  | -1.023868 | 0.754491  |
| N | -0.743884 | -1.023868 | 0.754491  |
| N | -0.743884 | -1.023868 | -0.754491 |
| N | 0.743884  | -1.023868 | -0.754491 |
| N | 1.203629  | 0.391083  | -0.754491 |
| N | 0.000000  | 1.265570  | -0.754491 |
| N | -1.203629 | 0.391083  | -0.754491 |

B3PW91

N<sub>5</sub>-N<sub>5</sub>(6) -546.954513 Hartrees

| Atom | x         | y         | z         |
|------|-----------|-----------|-----------|
| N    | 0.000000  | 0.000000  | 1.079097  |
| N    | 1.143959  | 0.660465  | 0.457419  |
| N    | -1.143959 | 0.660465  | 0.457419  |
| N    | 0.000000  | -1.320930 | 0.457419  |
| N    | 0.613802  | 1.690264  | -0.408559 |
| N    | 1.770713  | -0.313564 | -0.408559 |
| N    | -0.613802 | 1.690264  | -0.408559 |
| N    | -1.770713 | -0.313564 | -0.408559 |
| N    | -1.156911 | -1.376700 | -0.408559 |
| N    | 1.156911  | -1.376700 | -0.408559 |

B3PW91

N<sub>3</sub>-N<sub>5</sub>(7) -437.617015 Hartrees

| Atom | x        | y         | z         |
|------|----------|-----------|-----------|
| N    | 0.000000 | 1.105524  | 1.255321  |
| N    | 0.000000 | 0.667055  | 0.000000  |
| N    | 0.000000 | -1.105524 | 1.255321  |
| N    | 0.000000 | 0.000000  | 1.971865  |
| N    | 0.000000 | -0.667055 | 0.000000  |
| N    | 0.000000 | -1.105524 | -1.255321 |
| N    | 0.000000 | 0.000000  | -1.971865 |
| N    | 0.000000 | 1.105524  | -1.255321 |

B3PW91

N<sub>3</sub>-N<sub>5</sub>(8) -437.6173073 Hartrees

| Atom | x         | y         | z         |
|------|-----------|-----------|-----------|
| N    | 0.497825  | 1.906483  | 0.677084  |
| N    | 0.497825  | 1.906483  | -0.677084 |
| N    | 0.038339  | 0.780807  | -1.105842 |
| N    | -0.231101 | 0.096272  | 0.000000  |
| N    | 0.038339  | 0.780807  | 1.105842  |
| N    | -0.917907 | -1.120151 | 0.000000  |
| N    | 0.038339  | -2.175351 | -0.596298 |

|                                                    |           |               |           |
|----------------------------------------------------|-----------|---------------|-----------|
| N                                                  | 0.041159  | -2.205263     | 0.591452  |
| B3LYP                                              |           |               |           |
| N <sub>3</sub> (N <sub>3</sub> ) <sub>3</sub> (9)  |           | -656.4743353  | Hartrees  |
| Atom                                               | x         | y             | z         |
| N                                                  | -2.227010 | -1.738645     | 0.121189  |
| N                                                  | -1.437782 | -2.634964     | 0.037070  |
| N                                                  | -0.931297 | -1.318151     | -0.595915 |
| N                                                  | -0.111752 | -0.743109     | 0.465318  |
| N                                                  | -0.111751 | 0.743109      | 0.465318  |
| N                                                  | 0.918630  | 0.000000      | -0.220754 |
| N                                                  | 2.091236  | -0.000001     | 0.644751  |
| N                                                  | 3.202906  | 0.598728      | -0.239661 |
| N                                                  | 3.202906  | -0.598730     | -0.239661 |
| N                                                  | -0.931296 | 1.318152      | -0.595915 |
| N                                                  | -1.437780 | 2.634965      | 0.037070  |
| N                                                  | -2.227009 | 1.738646      | 0.121189  |
| B3LYP                                              |           |               |           |
| N <sub>3</sub> (N <sub>3</sub> ) <sub>3</sub> (10) |           | -985.0610569  | Hartrees  |
| Atom                                               | x         | y             | z         |
| N                                                  | -0.859579 | -0.007610     | 0.284747  |
| N                                                  | -0.220275 | -0.704324     | -0.825891 |
| N                                                  | -0.214506 | 0.827495      | -0.691324 |
| N                                                  | -3.028409 | -0.077157     | 1.213615  |
| N                                                  | -4.219823 | -0.032973     | 0.737085  |
| N                                                  | -2.239168 | 0.012190      | 0.134459  |
| N                                                  | -4.161840 | 0.081696      | -0.632783 |
| N                                                  | -2.934199 | 0.110175      | -1.009300 |
| N                                                  | 2.736627  | -2.332201     | -0.413730 |
| N                                                  | 2.157306  | -2.560439     | 0.802363  |
| N                                                  | 1.959122  | -1.588312     | -1.125429 |
| N                                                  | 1.025187  | -1.950336     | 0.867917  |
| N                                                  | 0.920159  | -1.340654     | -0.323988 |
| N                                                  | 1.591159  | 2.314652      | -0.873435 |
| N                                                  | 0.929862  | 1.396392      | -0.152345 |
| N                                                  | 2.563255  | 2.675716      | -0.117563 |
| N                                                  | 1.494196  | 1.189752      | 1.055328  |
| N                                                  | 2.500925  | 1.985938      | 1.070274  |
| B3LYP                                              |           |               |           |
| N <sub>5</sub> (N <sub>5</sub> ) <sub>3</sub> (11) |           | -1641.8050604 | Hartrees  |
| Atom                                               | x         | y             | z         |
| N                                                  | 0.251653  | -1.014665     | 0.884212  |
| N                                                  | -1.106223 | -0.667523     | 0.682876  |
| N                                                  | 0.914331  | 0.222381      | 0.600597  |
| N                                                  | 0.229505  | 0.722562      | -0.656680 |

|                                                    |           |               |           |
|----------------------------------------------------|-----------|---------------|-----------|
| N                                                  | 0.038339  | -2.175351     | 0.596298  |
| B3PW91                                             |           |               |           |
| N <sub>3</sub> (N <sub>3</sub> ) <sub>3</sub> (9)  |           | -656.226573   | Hartrees  |
| Atom                                               | x         | y             | z         |
| N                                                  | -0.136171 | -2.200111     | 1.764549  |
| N                                                  | -0.009533 | -1.386632     | 2.636847  |
| N                                                  | 0.585129  | -0.947992     | 1.306344  |
| N                                                  | -0.463818 | -0.120529     | 0.733892  |
| N                                                  | -0.463818 | -0.120529     | -0.733892 |
| N                                                  | 0.223913  | 0.903166      | 0.000000  |
| N                                                  | -0.634573 | 2.073554      | 0.000000  |
| N                                                  | 0.229723  | 3.166904      | -0.599915 |
| N                                                  | 0.229723  | 3.166904      | 0.599915  |
| N                                                  | 0.585129  | -0.947992     | -1.306344 |
| N                                                  | -0.009533 | -1.386632     | -2.636847 |
| N                                                  | -0.136171 | -2.200111     | -1.764549 |
| B3PW91                                             |           |               |           |
| N <sub>3</sub> (N <sub>3</sub> ) <sub>3</sub> (10) |           | -984.6995139  | Hartrees  |
| Atom                                               | x         | y             | z         |
| N                                                  | -0.857109 | -0.011048     | 0.288924  |
| N                                                  | -0.219098 | -0.689748     | -0.820638 |
| N                                                  | -0.211280 | 0.814761      | -0.682503 |
| N                                                  | -3.015790 | -0.077416     | 1.208353  |
| N                                                  | -4.203671 | -0.029913     | 0.728112  |
| N                                                  | -2.230476 | 0.010811      | 0.136490  |
| N                                                  | -4.141772 | 0.085210      | -0.630386 |
| N                                                  | -2.914752 | 0.111448      | -1.003136 |
| N                                                  | 2.737985  | -2.288778     | -0.409510 |
| N                                                  | 2.137611  | -2.572410     | 0.771282  |
| N                                                  | 1.969254  | -1.526560     | -1.108799 |
| N                                                  | 0.997050  | -1.980308     | 0.834282  |
| N                                                  | 0.916702  | -1.329036     | -0.325583 |
| N                                                  | 1.562447  | 2.322903      | -0.847987 |
| N                                                  | 0.928327  | 1.382654      | -0.146460 |
| N                                                  | 2.538683  | 2.673174      | -0.095632 |
| N                                                  | 1.504828  | 1.148919      | 1.039606  |
| N                                                  | 2.501061  | 1.955336      | 1.063582  |
| B3PW91                                             |           |               |           |
| N <sub>5</sub> (N <sub>5</sub> ) <sub>3</sub> (11) |           | -1641.2015012 | Hartrees  |
| Atom                                               | x         | y             | z         |
| N                                                  | -0.418859 | -0.437045     | -1.134279 |
| N                                                  | 0.537643  | -1.170265     | -0.439222 |
| N                                                  | -0.237083 | 0.941290      | -0.648816 |
| N                                                  | 0.428884  | 0.842066      | 0.668845  |

|                                               |           |             |           |                                               |           |             |           |
|-----------------------------------------------|-----------|-------------|-----------|-----------------------------------------------|-----------|-------------|-----------|
| N                                             | -1.169772 | 0.386880    | -0.310933 | N                                             | 0.849946  | -0.494463   | 0.784236  |
| N                                             | -0.054927 | 2.963088    | 0.294006  | N                                             | 2.683491  | 1.517382    | 0.050642  |
| N                                             | 0.358128  | 2.100577    | -0.655620 | N                                             | 1.515841  | 1.694780    | 0.667822  |
| N                                             | 0.279376  | 4.113173    | -0.156924 | N                                             | 3.360978  | 2.561461    | 0.353435  |
| N                                             | 0.946893  | 2.725371    | -1.691062 | N                                             | 1.461813  | 2.840521    | 1.346677  |
| N                                             | 0.902430  | 3.966762    | -1.382647 | N                                             | 2.605131  | 3.381163    | 1.142901  |
| N                                             | -1.692111 | -0.253395   | 1.863160  | N                                             | 1.656938  | -1.389490   | -1.212681 |
| N                                             | -2.776009 | -0.884834   | 2.344443  | N                                             | 2.256980  | -2.579559   | -1.217754 |
| N                                             | -1.299743 | 0.764290    | 2.649795  | N                                             | 2.214199  | -0.524492   | -2.060625 |
| N                                             | -3.052333 | -0.260605   | 3.427831  | N                                             | 3.209797  | -2.443504   | -2.062737 |
| N                                             | -2.138620 | 0.757658    | 3.617573  | N                                             | 3.175227  | -1.183561   | -2.591235 |
| N                                             | 2.265486  | 0.160543    | 0.466249  | N                                             | -1.390232 | 1.655819    | -0.577355 |
| N                                             | 3.067188  | 0.885157    | 1.285153  | N                                             | -1.556358 | 2.757012    | -1.329505 |
| N                                             | 2.988543  | -0.530559   | -0.453658 | N                                             | -2.435897 | 1.445462    | 0.244770  |
| N                                             | 4.249377  | 0.634765    | 0.886394  | N                                             | -2.694751 | 3.209697    | -0.985101 |
| N                                             | 4.201042  | -0.243692   | -0.192354 | N                                             | -3.237878 | 2.400548    | -0.010601 |
| N                                             | -2.628552 | 0.824296    | -2.103476 | N                                             | 0.871355  | -2.081850   | 2.518832  |
| N                                             | -1.850158 | -0.044077   | -1.438937 | N                                             | 0.246336  | -1.099831   | 1.878652  |
| N                                             | -3.147226 | 0.130944    | -3.049763 | N                                             | 0.085005  | -2.366039   | 3.494306  |
| N                                             | -1.906566 | -1.280520   | -1.959720 | N                                             | -0.900820 | -0.749259   | 2.453418  |
| N                                             | -2.713789 | -1.170889   | -2.950809 | N                                             | -0.993098 | -1.537159   | 3.463073  |
| N                                             | 1.052885  | -3.238528   | 0.739212  | N                                             | -2.553538 | -0.922247   | -1.992218 |
| N                                             | 0.632205  | -2.116348   | 0.123096  | N                                             | -1.686825 | -0.976855   | -0.978419 |
| N                                             | 1.358419  | -4.031419   | -0.215068 | N                                             | -3.574921 | -1.567610   | -1.569286 |
| N                                             | 0.697064  | -2.221069   | -1.218983 | N                                             | -2.156308 | -1.676932   | 0.057152  |
| N                                             | 1.141503  | -3.400323   | -1.427962 | N                                             | -3.322997 | -2.047041   | -0.314927 |
| <hr/>                                         |           |             |           | <hr/>                                         |           |             |           |
| <b>B3LYP</b>                                  |           |             |           | <b>B3PW91</b>                                 |           |             |           |
| <hr/>                                         |           |             |           | <hr/>                                         |           |             |           |
| N <sub>5</sub> (N <sub>5</sub> ) <sub>2</sub> |           | -820.902052 | Hartrees  | N <sub>5</sub> (N <sub>5</sub> ) <sub>2</sub> |           | -820.599196 | Hartrees  |
| <hr/>                                         |           |             |           | <hr/>                                         |           |             |           |
| Atom                                          | x         | y           | z         | Atom                                          | x         | y           | z         |
| <hr/>                                         |           |             |           | <hr/>                                         |           |             |           |
| N                                             | 1.410255  | 0.249386    | -3.577063 | N                                             | -1.036912 | 0.954852    | 3.588109  |
| N                                             | 1.192449  | -0.069052   | -2.356427 | N                                             | -1.041713 | 0.573832    | 2.367820  |
| N                                             | -0.139572 | 0.073933    | -2.208751 | N                                             | 0.151191  | -0.012102   | 2.204232  |
| N                                             | -0.736973 | 0.480857    | -3.337426 | N                                             | 0.888251  | 0.008484    | 3.314047  |
| N                                             | 0.218756  | 0.589418    | -4.184876 | N                                             | 0.151191  | 0.607203    | 4.172350  |
| N                                             | -0.829416 | -0.161273   | -1.052741 | N                                             | 0.589188  | -0.571549   | 1.044633  |
| N                                             | -0.829417 | -1.516141   | -0.618307 | N                                             | -0.121406 | -1.708358   | 0.618220  |
| N                                             | -0.829417 | -1.516141   | 0.618307  | N                                             | -0.121406 | -1.708358   | -0.618220 |
| N                                             | -0.829416 | -0.161273   | 1.052741  | N                                             | 0.589188  | -0.571549   | -1.044633 |
| N                                             | -0.572181 | 0.705719    | 0.000000  | N                                             | 0.840420  | 0.295280    | 0.000000  |
| N                                             | -0.139572 | 0.073933    | 2.208751  | N                                             | 0.151191  | -0.012102   | -2.204232 |
| N                                             | -0.736973 | 0.480857    | 3.337426  | N                                             | 0.888251  | 0.008484    | -3.314047 |
| N                                             | 0.218756  | 0.589418    | 4.184876  | N                                             | 0.151191  | 0.607203    | -4.172350 |
| N                                             | 1.410255  | 0.249386    | 3.577063  | N                                             | -1.036912 | 0.954852    | -3.588109 |
| N                                             | 1.192449  | -0.069052   | 2.356427  | N                                             | -1.041713 | 0.573832    | -2.367820 |
| <hr/>                                         |           |             |           | <hr/>                                         |           |             |           |

| B3LYP                 |           |           |           | B3PW91                |           |           |           |
|-----------------------|-----------|-----------|-----------|-----------------------|-----------|-----------|-----------|
| $N_5(N_5)_3$          |           |           |           | $N_5(N_5)_3$          |           |           |           |
| -1094.511423 Hartrees |           |           |           | -1094.109271 Hartrees |           |           |           |
| Atom                  | x         | y         | z         | Atom                  | x         | y         | z         |
| N                     | -1.151642 | 2.842904  | -0.970600 | N                     | -1.087114 | 2.854025  | -0.963799 |
| N                     | -0.364840 | 1.900584  | -0.591168 | N                     | -0.327591 | 1.889790  | -0.590112 |
| N                     | -0.947601 | 1.397521  | 0.507203  | N                     | -0.926489 | 1.396830  | 0.493237  |
| N                     | -2.092131 | 2.018476  | 0.804023  | N                     | -2.048227 | 2.040771  | 0.792725  |
| N                     | -2.222144 | 2.912693  | -0.111688 | N                     | -2.150278 | 2.943916  | -0.114788 |
| N                     | -0.453761 | 0.319649  | 1.323019  | N                     | -0.459554 | 0.310361  | 1.302859  |
| N                     | -0.559062 | -1.012130 | 0.637316  | N                     | -0.569131 | -0.989499 | 0.610897  |
| N                     | 0.542956  | -1.133168 | -0.225852 | N                     | 0.522498  | -1.114356 | -0.250458 |
| N                     | 1.353486  | -0.337004 | 0.375784  | N                     | 1.337427  | -0.342601 | 0.366319  |
| N                     | 0.967724  | 0.432359  | 1.384450  | N                     | 0.953953  | 0.402138  | 1.388468  |
| N                     | 2.668850  | -0.325961 | 0.003106  | N                     | 2.648785  | -0.340111 | 0.003157  |
| N                     | 3.435634  | -1.429469 | -0.050928 | N                     | 3.391650  | -1.447698 | -0.079631 |
| N                     | 4.581282  | -0.984998 | -0.414016 | N                     | 4.544104  | -1.010148 | -0.423104 |
| N                     | 4.520275  | 0.382410  | -0.573692 | N                     | 4.505337  | 0.350908  | -0.540150 |
| N                     | 3.335327  | 0.796279  | -0.313136 | N                     | 3.327252  | 0.775102  | -0.273394 |
| N                     | -1.756713 | -1.300875 | 0.069472  | N                     | -1.767992 | -1.284959 | 0.065853  |
| N                     | -2.588164 | -2.222438 | 0.590092  | N                     | -2.573132 | -2.217438 | 0.587367  |
| N                     | -3.600561 | -2.221831 | -0.190893 | N                     | -3.597022 | -2.216637 | -0.175511 |
| N                     | -3.400080 | -1.303166 | -1.206164 | N                     | -3.425339 | -1.290716 | -1.173558 |
| N                     | -2.268834 | -0.731834 | -1.046330 | N                     | -2.299137 | -0.709679 | -1.026375 |

  

| B3LYP                 |           |           |           | B3PW91                |           |           |           |
|-----------------------|-----------|-----------|-----------|-----------------------|-----------|-----------|-----------|
| $N_5(N_5)_4$          |           |           |           | $N_5(N_5)_4$          |           |           |           |
| -1368.158004 Hartrees |           |           |           | -1367.655016 Hartrees |           |           |           |
| Atom                  | x         | y         | z         | Atom                  | x         | y         | z         |
| N                     | -0.547063 | -3.514037 | 1.483810  | N                     | -0.527322 | -3.475075 | 1.519469  |
| N                     | -0.648041 | -2.509114 | 0.692454  | N                     | -0.634659 | -2.481732 | 0.717345  |
| N                     | 0.295311  | -1.656178 | 1.116215  | N                     | 0.300693  | -1.627301 | 1.128017  |
| N                     | 0.980677  | -2.128000 | 2.167450  | N                     | 0.987758  | -2.078319 | 2.176839  |
| N                     | 0.460444  | -3.278906 | 2.393478  | N                     | 0.473368  | -3.226936 | 2.416585  |
| N                     | 0.580924  | -0.409774 | 0.582652  | N                     | 0.575697  | -0.391066 | 0.581719  |
| N                     | 0.942159  | -0.569332 | -0.827006 | N                     | 0.937610  | -0.557021 | -0.812099 |
| N                     | 0.000040  | 0.000016  | -1.656825 | N                     | 0.002425  | 0.000290  | -1.645344 |
| N                     | -0.942300 | 0.569283  | -0.827212 | N                     | -0.943695 | 0.554404  | -0.822856 |
| N                     | -0.581026 | 0.410334  | 0.582472  | N                     | -0.580603 | 0.418745  | 0.572465  |
| N                     | -2.230714 | 0.167711  | -1.116665 | N                     | -2.221894 | 0.139464  | -1.109811 |
| N                     | -3.239176 | 1.050374  | -1.146037 | N                     | -3.233929 | 1.005719  | -1.132385 |
| N                     | -4.267460 | 0.351231  | -1.456771 | N                     | -4.250289 | 0.295501  | -1.450402 |
| N                     | -3.887700 | -0.963914 | -1.636963 | N                     | -3.855291 | -1.001125 | -1.642229 |
| N                     | -2.631693 | -1.082825 | -1.421283 | N                     | -2.599481 | -1.105286 | -1.426120 |
| N                     | 2.230710  | -0.168353 | -1.116578 | N                     | 2.222756  | -0.171416 | -1.104554 |
| N                     | 2.632259  | 1.082015  | -1.421156 | N                     | 2.628612  | 1.065200  | -1.418831 |
| N                     | 3.888201  | 0.962537  | -1.636878 | N                     | 3.881165  | 0.932701  | -1.636943 |



|                                    |           |             |           |                                    |           |             |           |
|------------------------------------|-----------|-------------|-----------|------------------------------------|-----------|-------------|-----------|
| N                                  | 4.267366  | -0.352796   | -1.456750 | N                                  | 4.246743  | -0.373381   | -1.448463 |
| N                                  | 3.238778  | -1.051473   | -1.145995 | N                                  | 3.215208  | -1.060443   | -1.129538 |
| N                                  | -0.295401 | 1.656971    | 1.115486  | N                                  | -0.305609 | 1.666577    | 1.091549  |
| N                                  | -0.980555 | 2.129146    | 2.166699  | N                                  | -0.983857 | 2.135704    | 2.138167  |
| N                                  | -0.460376 | 3.280193    | 2.392138  | N                                  | -0.472732 | 3.291463    | 2.348753  |
| N                                  | 0.546876  | 3.515063    | 1.482120  | N                                  | 0.516667  | 3.526272    | 1.435600  |
| N                                  | 0.647759  | 2.509830    | 0.691145  | N                                  | 0.620659  | 2.517064    | 0.653065  |
| MP2/cc-pV                          |           |             |           | B3LYP/cc-p                         |           |             |           |
| DZ                                 |           |             |           | VTZ                                |           |             |           |
| N <sub>3</sub> -N <sub>3</sub> (1) |           | -327.376176 | Hartrees  | N <sub>3</sub> -N <sub>3</sub> (1) |           | -328.311608 | Hartrees  |
| Atom                               | x         | y           | z         | Atom                               | x         | y           | z         |
| N                                  | 0.000000  | 1.727046    | 0.619289  | N                                  | 0.000000  | 1.737460    | 0.596692  |
| N                                  | 0.000000  | 1.727046    | -0.619289 | N                                  | 0.000000  | 1.737460    | -0.596692 |
| N                                  | -0.580346 | 0.456610    | 0.000000  | N                                  | -0.569961 | 0.459259    | 0.000000  |
| N                                  | 0.580346  | -0.456610   | 0.000000  | N                                  | 0.569961  | -0.459259   | 0.000000  |
| N                                  | 0.000000  | -1.727046   | 0.619289  | N                                  | 0.000000  | -1.737460   | 0.596692  |
| N                                  | 0.000000  | -1.727046   | -0.619289 | N                                  | 0.000000  | -1.737460   | -0.596692 |
| MP2/cc-pV                          |           |             |           | B3LYP/cc-p                         |           |             |           |
| DZ                                 |           |             |           | VTZ                                |           |             |           |
| N <sub>3</sub> -N <sub>3</sub> (2) |           | -327.235127 | Hartrees  | N <sub>3</sub> -N <sub>3</sub> (2) |           | -328.177965 | Hartrees  |
| Atom                               | x         | y           | z         | Atom                               | x         | y           | z         |
| N                                  | 0.000000  | 0.866917    | 0.767115  | N                                  | 0.000000  | 0.853647    | 0.759739  |
| N                                  | 0.750772  | -0.433458   | -0.767115 | N                                  | 0.739280  | -0.426824   | -0.759739 |
| N                                  | -0.750772 | -0.433458   | 0.767115  | N                                  | -0.739280 | -0.426824   | 0.759739  |
| N                                  | -0.750772 | -0.433458   | -0.767115 | N                                  | -0.739280 | -0.426824   | -0.759739 |
| N                                  | 0.750772  | -0.433458   | 0.767115  | N                                  | 0.739280  | -0.426824   | 0.759739  |
| N                                  | 0.000000  | 0.866917    | -0.767115 | N                                  | 0.000000  | 0.853647    | -0.759739 |
| MP2/cc-pV                          |           |             |           | B3LYP/cc-p                         |           |             |           |
| DZ                                 |           |             |           | VTZ                                |           |             |           |
| N <sub>5</sub> -N <sub>5</sub> (3) |           | -545.834865 | Hartrees  | N <sub>5</sub> -N <sub>5</sub> (3) |           | -547.402615 | Hartrees  |
| Atom                               | x         | y           | z         | Atom                               | x         | y           | z         |
| N                                  | 0.000000  | 0.681214    | 2.643669  | N                                  | 0.000000  | 0.686835    | 2.621696  |
| N                                  | 0.000000  | 1.127430    | 1.405652  | N                                  | 0.000000  | 1.111618    | 1.419791  |
| N                                  | 0.000000  | 0.000000    | 0.678563  | N                                  | 0.000000  | 0.000000    | 0.674813  |
| N                                  | 0.000000  | -1.127430   | 1.405652  | N                                  | 0.000000  | -1.111618   | 1.419791  |
| N                                  | 0.000000  | -0.681214   | 2.643669  | N                                  | 0.000000  | -0.686835   | 2.621696  |
| N                                  | 0.000000  | 0.000000    | -0.678563 | N                                  | 0.000000  | 0.000000    | -0.674813 |
| N                                  | -1.127430 | 0.000000    | -1.405652 | N                                  | -1.111618 | 0.000000    | -1.419791 |
| N                                  | -0.681214 | 0.000000    | -2.643669 | N                                  | -0.686835 | 0.000000    | -2.621696 |
| N                                  | 0.681214  | 0.000000    | -2.643669 | N                                  | 0.686835  | 0.000000    | -2.621696 |
| N                                  | 1.127430  | 0.000000    | -1.405652 | N                                  | 1.111618  | 0.000000    | -1.419791 |
| MP2/cc-pV                          |           |             |           | B3LYP/cc-p                         |           |             |           |
| DZ                                 |           |             |           | VTZ                                |           |             |           |
| N <sub>5</sub> -N <sub>5</sub> (4) |           | -545.829897 | Hartrees  | N <sub>5</sub> -N <sub>5</sub> (4) |           | -547.394887 | Hartrees  |

| Atom | x        | y         | z         |
|------|----------|-----------|-----------|
| N    | 0.000000 | 0.676786  | 2.648757  |
| N    | 0.000000 | 1.128703  | 1.405436  |
| N    | 0.000000 | 0.000000  | 0.685084  |
| N    | 0.000000 | -1.128703 | 1.405436  |
| N    | 0.000000 | -0.676786 | 2.648757  |
| N    | 0.000000 | 0.000000  | -0.685084 |
| N    | 0.000000 | -1.128703 | -1.405436 |
| N    | 0.000000 | -0.676786 | -2.648757 |
| N    | 0.000000 | 0.676786  | -2.648757 |
| N    | 0.000000 | 1.128703  | -1.405436 |

MP2/cc-pV

DZ

| N <sub>5</sub> -N <sub>5</sub> (5) |           | -545.413345 | Hartrees  |
|------------------------------------|-----------|-------------|-----------|
| Atom                               | x         | y           | z         |
| N                                  | 0.000000  | 1.281130    | 0.767040  |
| N                                  | -1.218427 | 0.395891    | 0.767040  |
| N                                  | 1.218427  | 0.395891    | 0.767040  |
| N                                  | 0.753029  | -1.036456   | 0.767040  |
| N                                  | -0.753029 | -1.036456   | 0.767040  |
| N                                  | -0.753029 | -1.036456   | -0.767040 |
| N                                  | 0.753029  | -1.036456   | -0.767040 |
| N                                  | 1.218427  | 0.395891    | -0.767040 |
| N                                  | 0.000000  | 1.281130    | -0.767040 |
| N                                  | -1.218427 | 0.395891    | -0.767040 |

MP2/cc-pV

DZ

| N <sub>5</sub> -N <sub>5</sub> (6) |           | -545.717364 | Hartrees  |
|------------------------------------|-----------|-------------|-----------|
| Atom                               | x         | y           | z         |
| N                                  | 0.000000  | 0.000000    | 1.100943  |
| N                                  | 1.160897  | 0.670244    | 0.483588  |
| N                                  | -1.160897 | 0.670244    | 0.483588  |
| N                                  | 0.000000  | -1.340489   | 0.483588  |
| N                                  | 0.623102  | 1.695278    | -0.425285 |
| N                                  | 1.779705  | -0.308017   | -0.425285 |
| N                                  | -0.623102 | 1.695278    | -0.425285 |
| N                                  | -1.779705 | -0.308017   | -0.425285 |
| N                                  | -1.156603 | -1.387261   | -0.425285 |
| N                                  | 1.156603  | -1.387261   | -0.425285 |

MP2/cc-pV

DZ

| N <sub>5</sub> -N <sub>5</sub> (7) |   | -436.63571 | Hartrees |
|------------------------------------|---|------------|----------|
| Atom                               | x | y          | z        |

| Atom | x        | y         | z         |
|------|----------|-----------|-----------|
| N    | 0.000000 | 0.676978  | 2.626955  |
| N    | 0.000000 | 1.109782  | 1.414124  |
| N    | 0.000000 | 0.000000  | 0.684678  |
| N    | 0.000000 | -1.109782 | 1.414124  |
| N    | 0.000000 | -0.676978 | 2.626955  |
| N    | 0.000000 | 0.000000  | -0.684678 |
| N    | 0.000000 | -1.109782 | -1.414124 |
| N    | 0.000000 | -0.676978 | -2.626955 |
| N    | 0.000000 | 0.676978  | -2.626955 |
| N    | 0.000000 | 1.109782  | -1.414124 |

B3LYP/cc-p

VTZ

| N <sub>5</sub> -N <sub>5</sub> (5) |           | -546.996961 | Hartrees  |
|------------------------------------|-----------|-------------|-----------|
| Atom                               | x         | y           | z         |
| N                                  | 0.000000  | 1.271333    | 0.757888  |
| N                                  | -1.209109 | 0.392863    | 0.757888  |
| N                                  | 1.209109  | 0.392863    | 0.757888  |
| N                                  | 0.747271  | -1.028530   | 0.757888  |
| N                                  | -0.747271 | -1.028530   | 0.757888  |
| N                                  | -0.747271 | -1.028530   | -0.757888 |
| N                                  | 0.747271  | -1.028530   | -0.757888 |
| N                                  | 1.209109  | 0.392863    | -0.757888 |
| N                                  | 0.000000  | 1.271333    | -0.757888 |
| N                                  | -1.209109 | 0.392863    | -0.757888 |

B3LYP/cc-p

VTZ

| N <sub>5</sub> -N <sub>5</sub> (6) |           | -547.295983 | Hartrees  |
|------------------------------------|-----------|-------------|-----------|
| Atom                               | x         | y           | z         |
| N                                  | 0.000000  | 0.000000    | 1.075219  |
| N                                  | 1.149110  | 0.663439    | 0.462526  |
| N                                  | -1.149110 | 0.663439    | 0.462526  |
| N                                  | 0.000000  | -1.326878   | 0.462526  |
| N                                  | 0.609726  | 1.702749    | -0.410466 |
| N                                  | 1.779487  | -0.323336   | -0.410466 |
| N                                  | -0.609726 | 1.702749    | -0.410466 |
| N                                  | -1.779487 | -0.323336   | -0.410466 |
| N                                  | -1.169761 | -1.379413   | -0.410466 |
| N                                  | 1.169761  | -1.379413   | -0.410466 |

B3LYP/cc-p

VTZ

| N <sub>5</sub> -N <sub>5</sub> (7) |   | -437.890322 | Hartrees |
|------------------------------------|---|-------------|----------|
| Atom                               | x | y           | z        |

|                                                    |           |              |           |                                                    |           |             |           |
|----------------------------------------------------|-----------|--------------|-----------|----------------------------------------------------|-----------|-------------|-----------|
| N                                                  | 0.000000  | 1.124448     | 1.263106  | N                                                  | 0.000000  | 1.104665    | 1.256086  |
| N                                                  | 0.000000  | 0.685049     | 0.000000  | N                                                  | 0.000000  | 0.665705    | 0.000000  |
| N                                                  | 0.000000  | -1.124448    | 1.263106  | N                                                  | 0.000000  | -1.104665   | 1.256086  |
| N                                                  | 0.000000  | 0.000000     | 1.995184  | N                                                  | 0.000000  | 0.000000    | 1.974239  |
| N                                                  | 0.000000  | -0.685049    | 0.000000  | N                                                  | 0.000000  | -0.665705   | 0.000000  |
| N                                                  | 0.000000  | -1.124448    | -1.263106 | N                                                  | 0.000000  | -1.104665   | -1.256086 |
| N                                                  | 0.000000  | 0.000000     | -1.995184 | N                                                  | 0.000000  | 0.000000    | -1.974239 |
| N                                                  | 0.000000  | 1.124448     | -1.263106 | N                                                  | 0.000000  | 1.104665    | -1.256086 |
| <hr/>                                              |           |              |           | <hr/>                                              |           |             |           |
| MP2/cc-pV                                          |           |              |           | B3LYP/cc-p                                         |           |             |           |
| DZ                                                 |           |              |           | VTZ                                                |           |             |           |
| <hr/>                                              |           |              |           | <hr/>                                              |           |             |           |
| N <sub>5</sub> -N <sub>3</sub> (8)                 |           | -436.609984  | Hartrees  | N <sub>5</sub> -N <sub>3</sub> (8)                 |           |             | Hartrees  |
| <hr/>                                              |           |              |           | <hr/>                                              |           |             |           |
| Atom                                               | x         | y            | z         | Atom                                               | x         | y           | z         |
| <hr/>                                              |           |              |           | <hr/>                                              |           |             |           |
| N                                                  | 0.536065  | 1.908356     | 0.677540  |                                                    |           |             |           |
| N                                                  | 0.536065  | 1.908356     | -0.677540 |                                                    |           |             |           |
| N                                                  | 0.033657  | 0.768098     | -1.121610 |                                                    |           |             |           |
| N                                                  | -0.254687 | 0.099915     | 0.000000  |                                                    |           |             |           |
| N                                                  | 0.033657  | 0.768098     | 1.121610  |                                                    |           |             |           |
| N                                                  | -0.952073 | -1.123316    | 0.000000  |                                                    |           |             |           |
| N                                                  | 0.033657  | -2.164754    | -0.614548 |                                                    |           |             |           |
| N                                                  | 0.033657  | -2.164754    | 0.614548  |                                                    |           |             |           |
| <hr/>                                              |           |              |           | <hr/>                                              |           |             |           |
| MP2/cc-pV                                          |           |              |           | B3LYP/cc-p                                         |           |             |           |
| DZ                                                 |           |              |           | VTZ                                                |           |             |           |
| <hr/>                                              |           |              |           | <hr/>                                              |           |             |           |
| N <sub>3</sub> (N <sub>3</sub> ) <sub>3</sub> (9)  |           | -654.7693968 | Hartrees  | N <sub>3</sub> (N <sub>3</sub> ) <sub>3</sub> (9)  |           | -656.596485 | Hartrees  |
| <hr/>                                              |           |              |           | <hr/>                                              |           |             |           |
| Atom                                               | x         | y            | z         | Atom                                               | x         | y           | z         |
| <hr/>                                              |           |              |           | <hr/>                                              |           |             |           |
| N                                                  | -0.091694 | -2.253887    | 1.556990  | N                                                  | -0.126509 | -2.214191   | 1.798238  |
| N                                                  | -0.073765 | -1.517985    | 2.546385  | N                                                  | -0.026692 | -1.411572   | 2.662905  |
| N                                                  | 0.605402  | -0.902625    | 1.294231  | N                                                  | 0.596841  | -0.929943   | 1.323752  |
| N                                                  | -0.472806 | -0.073911    | 0.752985  | N                                                  | -0.459638 | -0.127042   | 0.745299  |
| N                                                  | -0.472806 | -0.073911    | -0.752985 | N                                                  | -0.459638 | -0.127042   | -0.745299 |
| N                                                  | 0.238789  | 0.949942     | 0.000000  | N                                                  | 0.208140  | 0.907147    | 0.000000  |
| N                                                  | -0.647901 | 2.112561     | 0.000000  | N                                                  | -0.651616 | 2.071160    | 0.000000  |
| N                                                  | 0.237418  | 3.217156     | -0.616625 | N                                                  | 0.237737  | 3.193595    | -0.592114 |
| N                                                  | 0.237418  | 3.217156     | 0.616625  | N                                                  | 0.237737  | 3.193595    | 0.592114  |
| N                                                  | 0.605402  | -0.902625    | -1.294231 | N                                                  | 0.596841  | -0.929943   | -1.323752 |
| N                                                  | -0.073765 | -1.517985    | -2.546385 | N                                                  | -0.026692 | -1.411572   | -2.662905 |
| N                                                  | -0.091694 | -2.253887    | -1.556990 | N                                                  | -0.126509 | -2.214191   | -1.798238 |
| <hr/>                                              |           |              |           | <hr/>                                              |           |             |           |
| MP2/cc-pV                                          |           |              |           | B3LYP/cc-p                                         |           |             |           |
| DZ                                                 |           |              |           | VTZ                                                |           |             |           |
| <hr/>                                              |           |              |           | <hr/>                                              |           |             |           |
| N <sub>3</sub> (N <sub>3</sub> ) <sub>3</sub> (10) |           | -982.4962496 | Hartrees  | N <sub>3</sub> (N <sub>3</sub> ) <sub>3</sub> (10) |           | -985.223065 | Hartrees  |
| <hr/>                                              |           |              |           | <hr/>                                              |           |             |           |
| Atom                                               | x         | y            | z         | Atom                                               | x         | y           | z         |
| <hr/>                                              |           |              |           | <hr/>                                              |           |             |           |
| N                                                  | 0.901308  | 0.034451     | 0.326420  | N                                                  | -0.860909 | -0.010226   | 0.284576  |
| N                                                  | 0.298077  | 0.680307     | -0.869121 | N                                                  | -0.216032 | -0.697976   | -0.827774 |
| N                                                  | 0.278488  | -0.864614    | -0.635678 | N                                                  | -0.206820 | 0.825762    | -0.677895 |
| N                                                  | 3.075044  | 0.139667     | 1.220994  | N                                                  | -3.024634 | -0.078800   | 1.205164  |

|                                                    |           |              |           |                                                    |           |              |           |
|----------------------------------------------------|-----------|--------------|-----------|----------------------------------------------------|-----------|--------------|-----------|
| N                                                  | 4.286114  | 0.047939     | 0.709448  | N                                                  | -4.211026 | -0.028137    | 0.733856  |
| N                                                  | 2.281981  | -0.017137    | 0.152550  | N                                                  | -2.237013 | 0.014837     | 0.133475  |
| N                                                  | 4.204504  | -0.155728    | -0.633471 | N                                                  | -4.152632 | 0.095153     | -0.630883 |
| N                                                  | 2.937576  | -0.198832    | -1.001655 | N                                                  | -2.930068 | 0.122255     | -1.002561 |
| N                                                  | -2.858195 | 1.920061     | -0.401942 | N                                                  | 2.757698  | -2.276278    | -0.399957 |
| N                                                  | -2.218930 | 2.454060     | 0.666332  | N                                                  | 2.119019  | -2.630971    | 0.745607  |
| N                                                  | -2.014877 | 1.172105     | -1.097071 | N                                                  | 2.001774  | -1.489813    | -1.080966 |
| N                                                  | -0.959979 | 2.050806     | 0.689472  | N                                                  | 0.971488  | -2.057841    | 0.795861  |
| N                                                  | -0.878106 | 1.273674     | -0.399861 | N                                                  | 0.917625  | -1.345967    | -0.329691 |
| N                                                  | -1.650767 | -2.180247    | -0.803493 | N                                                  | 1.562720  | 2.346796     | -0.832689 |
| N                                                  | -0.912654 | -1.321807    | -0.081461 | N                                                  | 0.931565  | 1.397105     | -0.138278 |
| N                                                  | -2.702934 | -2.391508    | -0.042191 | N                                                  | 2.540167  | 2.695284     | -0.088955 |
| N                                                  | -1.471486 | -0.976264    | 1.095288  | N                                                  | 1.523247  | 1.156613     | 1.041906  |
| N                                                  | -2.595164 | -1.666932    | 1.105439  | N                                                  | 2.513831  | 1.962204     | 1.069204  |
| MP2/cc-pV                                          |           |              |           | B3LYP/cc-pV                                        |           |              |           |
| DZ                                                 |           |              |           | TZ                                                 |           |              |           |
| N <sub>5</sub> (N <sub>5</sub> ) <sub>5</sub> (11) |           | -1637.534696 | Hartrees  | N <sub>5</sub> (N <sub>5</sub> ) <sub>5</sub> (11) |           | -1642.067468 | Hartrees  |
| Atom                                               | x         | y            | z         | Atom                                               | x         | y            | z         |
| N                                                  | -0.013907 | -0.557141    | -1.301928 | N                                                  | 0.000000  | 0.000000     | 0.000000  |
| N                                                  | 1.279602  | -0.452749    | -0.726512 | N                                                  | 1.410669  | 0.000000     | 0.000000  |
| N                                                  | -0.687252 | 0.576895     | -0.701823 | N                                                  | -0.294405 | 1.396628     | 0.000000  |
| N                                                  | -0.261349 | 0.501410     | 0.760988  | N                                                  | 0.662233  | 1.971545     | 1.017944  |
| N                                                  | 1.157320  | 0.150717     | 0.601884  | N                                                  | 1.870878  | 1.204105     | 0.658205  |
| N                                                  | 0.434514  | 2.839993     | 0.787720  | N                                                  | 1.324363  | 3.790419     | -0.471688 |
| N                                                  | -0.317972 | 1.811707     | 1.212825  | N                                                  | 0.863396  | 3.296467     | 0.686846  |
| N                                                  | -0.026729 | 3.855469     | 1.487963  | N                                                  | 1.347124  | 5.050991     | -0.295485 |
| N                                                  | -1.236230 | 2.145324     | 2.134557  | N                                                  | 0.604495  | 4.262329     | 1.577255  |
| N                                                  | -1.044064 | 3.436321     | 2.296356  | N                                                  | 0.896971  | 5.344822     | 0.974422  |
| N                                                  | 2.066298  | 0.369362     | -1.509614 | N                                                  | 1.915214  | -0.082358    | -1.279804 |
| N                                                  | 3.245028  | -0.080824    | -1.970442 | N                                                  | 2.754039  | -1.066615    | -1.618809 |
| N                                                  | 1.777120  | 1.628691     | -1.875773 | N                                                  | 1.664032  | 0.742607     | -2.302251 |
| N                                                  | 3.708355  | 0.940834     | -2.654564 | N                                                  | 3.020497  | -0.853048    | -2.846311 |
| N                                                  | 2.819106  | 1.976278     | -2.600754 | N                                                  | 2.342203  | 0.267316     | -3.271056 |
| N                                                  | -2.055854 | 0.469930     | -0.746147 | N                                                  | -1.583529 | 1.745604     | 0.225062  |
| N                                                  | -2.780497 | 1.451329     | -1.323657 | N                                                  | -2.271513 | 2.456901     | -0.693593 |
| N                                                  | -2.813611 | -0.508077    | -0.200292 | N                                                  | -2.337840 | 1.504023     | 1.321571  |
| N                                                  | -4.017963 | 1.062280     | -1.145553 | N                                                  | -3.414138 | 2.636796     | -0.180874 |
| N                                                  | -4.040125 | -0.126985    | -0.465235 | N                                                  | -3.456437 | 2.042389     | 1.073974  |
| N                                                  | 0.861895  | -0.826370    | 2.759131  | N                                                  | 3.670035  | 1.657408     | 2.093132  |
| N                                                  | 1.387412  | -0.886797    | 1.541205  | N                                                  | 2.609233  | 0.904480     | 1.787049  |
| N                                                  | 1.426142  | -1.866925    | 3.369646  | N                                                  | 4.152924  | 1.124164     | 3.146685  |
| N                                                  | 2.272778  | -1.859088    | 1.347752  | N                                                  | 2.448812  | -0.108589    | 2.643759  |
| N                                                  | 2.270684  | -2.484109    | 2.524144  | N                                                  | 3.405335  | 0.022261     | 3.478316  |
| N                                                  | -1.298881 | -2.461555    | -1.850954 | N                                                  | -1.299476 | -1.822814    | 0.752458  |

|   |           |           |           |   |           |           |          |
|---|-----------|-----------|-----------|---|-----------|-----------|----------|
| N | -0.560065 | -1.796323 | -0.950602 | N | -0.532464 | -0.759757 | 1.034551 |
| N | -1.740108 | -3.498373 | -1.171747 | N | -1.648968 | -2.278364 | 1.886843 |
| N | -0.538300 | -2.364950 | 0.264269  | N | -0.424529 | -0.557833 | 2.355085 |
| N | -1.273345 | -3.446274 | 0.107155  | N | -1.107797 | -1.490910 | 2.882829 |

---
